# Supplementary material
Source: HighWire-hosted journal article supplement (https://rmdopen.bmj.com/content/5/2/e000946)

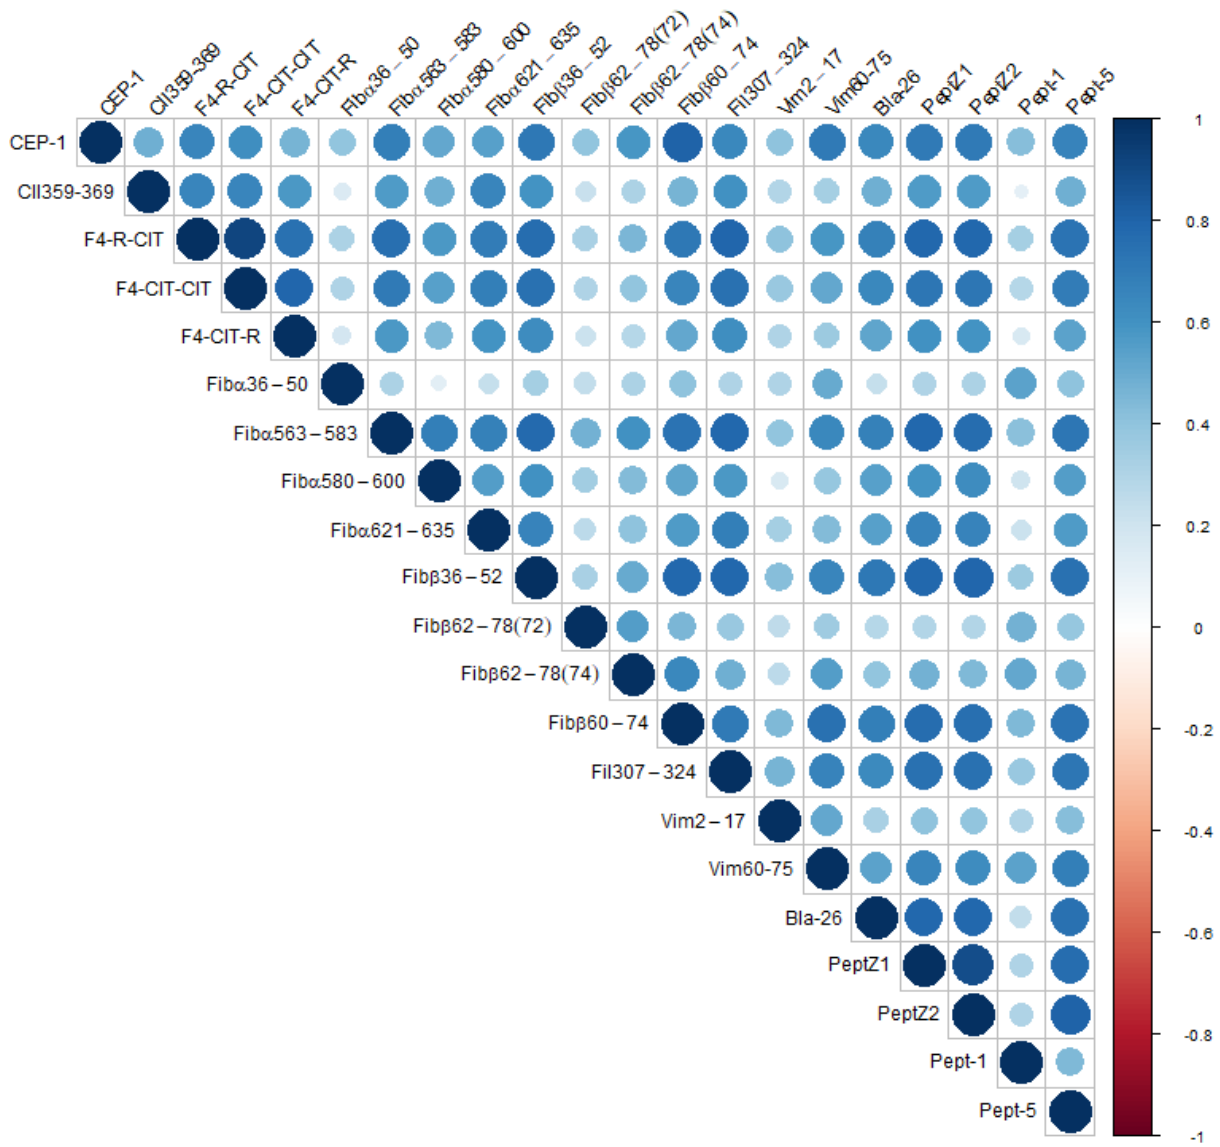

Supplement: inline-supplementary-material-2 [file inline-supplementary-material-2.pdf]
